# Supplementary material for: NLRP3, NLRC4 and NLRC5 Gene Polymorphisms Associate with Susceptibility of Pulmonary Aspergillosis in Non-Neutropenic Patients
Source: MDPI journal article supplement (doi:10.3390/jcm11071870), 2022-03-28
Supplement: s1 [file s1]

**Supplementary Table S1.** Genotype distribution of NLRs SNPs in pulmonary aspergillosis cases and controls.

| Gene  | SNP        | Model      | Genotype | Case     | Control  | OR(95% CI)                  | p Value  |
|-------|------------|------------|----------|----------|----------|-----------------------------|----------|
| NLRP3 | rs3806265  | Codominant | CC/CT/TT | 21/35/17 | 14/61/28 |                             | 0.0451 * |
|       |            | Dominant   | CC+CT/TT | 56/17    | 75/28    | 1.23 (0.6289 to 2.394)      | 0.5593   |
|       |            | Recessive  | CC/CT+TT | 21/52    | 14/89    | 2.567(1.239 to 5.255)       | 0.0130 * |
|       |            | Allele     | C/T      | 77/69    | 89/117   | 1.467(0.9608 to 2.254)      | 0.0774   |
|       | rs7525979  | Codominant | TT/CT/CC | 3/23/47  | 0/37/66  |                             | 0.1066   |
|       |            | Dominant   | TT+CT/CC | 26/47    | 37/66    | 0.9868(0.5271 to 1.807)     | 0.9667   |
|       |            | Recessive  | TT/CT+CC | 3/70     | 0/103    | Infinity(1.241 to Infinity) | 0.1378   |
|       |            | Allele     | T/C      | 29/117   | 37/169   | 1.132(0.652 to 1.917)       | 0.6524   |
|       | rs10754558 | Codominant | GG/CG/CC | 20/28/25 | 26/45/32 |                             | 0.7780   |
|       |            | Dominant   | GG+CG/CC | 48/25    | 71/32    | 0.8654(0.4591 to 1.662)     | 0.6571   |
|       |            | Recessive  | GG/CG+CC | 20/53    | 26/77    | 1.118(0.562 to 2.153)       | 0.7486   |
|       |            | Allele     | G/C      | 68/78    | 97/109   | 0.9796(0.6403 to 1.495)     | 0.9244   |
| NLRC4 | rs12989936 | Codominant | TT/CT/CC | 6/34/33  | 14/48/41 |                             | 0.5012   |
|       |            | Dominant   | TT+CT/CC | 40/33    | 62/41    | 0.8016(0.4286 to 1.501)     | 0.4746   |
|       |            | Recessive  | TT/CT+CC | 6/67     | 14/89    | 0.5693(0.2109 to 1.473)     | 0.2685   |
|       |            | Allele     | T/C      | 46/100   | 76/130   | 0.7868(0.4971 to 1.221)     | 0.2954   |
|       | rs212704   | Codominant | TT/CT/CC | 10/41/22 | 27/49/27 |                             | 0.1329   |
|       |            | Dominant   | TT+CT/CC | 51/22    | 76/27    | 0.8236(0.4285 to 1.578)     | 0.5672   |
|       |            | Recessive  | TT/CT+CC | 10/63    | 27/76    | 0.4468(0.2071 to 0.959)     | 0.0447 * |
|       |            | Allele     | T/C      | 61/85    | 103/103  | 0.7176(0.4649 to 1.097)     | 0.1278   |
|       | rs7562653  | Codominant | CC/CT/TT | 14/32/27 | 16/54/33 |                             | 0.5260   |
|       |            | Dominant   | CC+CT/TT | 46/27    | 70/33    | 0.8032(0.4323 to 1.508)     | 0.4951   |
|       |            | Recessive  | CC/CT+TT | 14/59    | 16/87    | 1.29(0.6008 to 2.808)       | 0.5265   |
|       |            | Allele     | C/T      | 60/86    | 86/120   | 0.9735(0.6276 to 1.5)       | 0.9027   |
|       | rs479333   | Codominant | GG/CG/CC | 6/36/31  | 13/47/43 |                             | 0.6392   |
|       |            | Dominant   | GG+CG/CC | 42/31    | 60/43    | 0.971(0.521 to 1.743)       | 0.9242   |
|       |            | Recessive  | GG/CG+CC | 6/67     | 13/90    | 0.62(0.2264 to 1.655)       | 0.3538   |
|       |            | Allele     | G/C      | 48/98    | 73/133   | 0.8924(0.5667 to 1.384)     | 0.6183   |
|       | rs385076   | Codominant | CC/CT/TT | 12/33/28 | 15/51/37 |                             | 0.8468   |
|       |            | Dominant   | CC+CT/TT | 45/28    | 66/37    | 0.901(0.4956 to 1.659)      | 0.7417   |
|       |            | Recessive  | CC/CT+TT | 12/61    | 15/88    | 1.154(0.4848 to 2.567)      | 0.7338   |
|       |            | Allele     | C/T      | 57/89    | 81/125   | 0.9883(0.6479 to 1.534)     | 0.9578   |
| NLRC5 | rs12598522 | Codominant | TT/CT/CC | 23/37/13 | 20/53/30 |                             | 0.09069  |
|       |            | Dominant   | TT+CT/CC | 60/13    | 73/30    | 1.897(0.9209 to 3.82)       | 0.0851   |
|       |            | Recessive  | TT/CT+CC | 23/50    | 20/83    | 1.909(0.957 to 3.897)       | 0.0659   |
|       |            | Allele     | T/C      | 83/63    | 93/113   | 1.601(1.048 to 2.47)        | 0.0305 * |
|       | rs34531240 | Codominant | TT/CT/CC | 13/34/26 | 17/61/25 |                             | 0.2013   |
|       |            | Dominant   | TT+CT/CC | 47/26    | 78/25    | 0.5794(0.3094 to 1.142)     | 0.1022   |
|       |            | Recessive  | TT/CT+CC | 13/60    | 17/86    | 1.096(0.4972 to 2.48)       | 0.8208   |
|       |            | Allele     | T/C      | 60/86    | 95/111   | 0.8152(0.527 to 1.25)       | 0.3499   |
|       | rs28438857 | Codominant | TT/CT/CC | 13/34/26 | 17/61/25 |                             | 0.2013   |
|       |            | Dominant   | TT+CT/CC | 47/26    | 78/25    | 0.5794(0.3094 to 1.142)     | 0.1022   |
|       |            | Recessive  | TT/CT+CC | 13/60    | 17/86    | 1.096(0.4972 to 2.48)       | 0.8208   |
|       |            | Allele     | T/C      | 60/86    | 95/111   | 0.8152(0.527 to 1.25)       | 0.3499   |
|       | rs3995818  | Codominant | AA/AG/GG | 13/35/25 | 17/61/25 |                             | 0.2815   |
|       |            | Dominant   | AA+AG/GG | 48/25    | 78/25    | 0.6154(0.3271 to 1.226)     | 0.1483   |
|       |            | Recessive  | AA/AG+GG | 13/60    | 17/86    | 1.096(0.4972 to 2.48)       | 0.8208   |
|       |            | Allele     | A/G      | 61/85    | 95/111   | 0.8385(0.543 to 1.284)      | 0.4198   |

|           |            |          |          |          |                         |          |
|-----------|------------|----------|----------|----------|-------------------------|----------|
| rs3995817 | Codominant | CC/CT/TT | 13/34/26 | 17/61/25 |                         | 0.2013   |
|           | Dominant   | CC+CT/TT | 47/26    | 78/25    | 0.5794(0.3094 to 1.142) | 0.1022   |
|           | Recessive  | CC/CT+TT | 13/60    | 17/86    | 1.096(0.4972 to 2.48)   | 0.8208   |
|           | Allele     | C/T      | 60/86    | 95/111   | 0.8152(0.527 to 1.25)   | 0.3499   |
| rs1684579 | Codominant | CC/CT/TT | 12/31/30 | 17/60/26 |                         | 0.0661   |
|           | Dominant   | CC+CT/TT | 43/30    | 77/26    | 0.484(0.2489 to 0.9213) | 0.0261 * |
|           | Recessive  | CC/CT+TT | 12/61    | 17/86    | 0.9952(0.4295 to 2.301) | 0.9907   |
|           | Allele     | C/T      | 55/91    | 94/112   | 0.7201(0.4725 to 1.111) | 0.1364   |
| rs3751705 | Codominant | CC/CT/TT | 9/32/32  | 12/41/50 |                         | 0.8241   |
|           | Dominant   | CC+CT/TT | 41/32    | 53/50    | 1.209(0.6563 to 2.201)  | 0.5373   |
|           | Recessive  | CC/CT+TT | 9/64     | 12/91    | 1.066(0.4473 to 2.569)  | 0.8912   |
|           | Allele     | C/T      | 50/96    | 65/141   | 1.13(0.7159 to 1.767)   | 0.5956   |

\*, a *p* value < 0.05 indicated a statistically significant difference.

**Supplementary Table S2.** Genotype distribution of NLRs SNPs in non-ABPA group, ABPA group and controls.

| Gene  | SNP        | Model      | Non-ABPA Group | ABPA Group | Control Group | P1 Value <sup>1</sup> | P2 Value <sup>2</sup> |
|-------|------------|------------|----------------|------------|---------------|-----------------------|-----------------------|
| NLRP3 | rs3806265  | Codominant | 17/24/16       | 4/11/1     | 14/61/28      | 0.0298 *              | 0.1430                |
|       |            | Dominant   | 41/16          | 15/1       | 75/28         | 0.9044                | 0.1140                |
|       |            | Recessive  | 17/40          | 4/12       | 14/89         | 0.0129 *              | 0.4180                |
|       |            | Allele     | 58/56          | 19/13      | 89/117        | 0.1872                | 0.0874                |
|       | rs7525979  | Codominant | 3/17/37        | 0/6/10     | 0/37/66       | 0.0542                | NA                    |
|       |            | Dominant   | 20/37          | 6/10       | 37/66         | 0.9159                | 0.9027                |
|       |            | Recessive  | 3/54           | 0/16       | 0/103         | 0.0815                | NA                    |
|       |            | Allele     | 23/91          | 6/26       | 37/169        | 0.6270                | 0.9141                |
|       | rs10754558 | Codominant | 18/21/18       | 2/7/7      | 26/45/32      | 0.6201                | 0.4415                |
|       |            | Dominant   | 39/18          | 9/7        | 71/32         | 0.9468                | 0.3147                |
|       |            | Recessive  | 18/39          | 2/14       | 26/77         | 0.3900                | 0.4230                |
|       |            | Allele     | 57/57          | 11/21      | 97/109        | 0.6175                | 0.1790                |
| NLRC4 | rs12989936 | Codominant | 4/26/27        | 2/8/6      | 14/48/41      | 0.3845                | 0.9681                |
|       |            | Dominant   | 30/27          | 10/6       | 62/41         | 0.3541                | 0.8607                |
|       |            | Recessive  | 4/53           | 2/14       | 14/89         | 0.3177                | 0.7835                |
|       |            | Allele     | 34/80          | 12/20      | 76/130        | 0.2023                | 0.9473                |
|       | rs212704   | Codominant | 8/31/18        | 2/10/4     | 27/49/27      | 0.2015                | 0.4267                |
|       |            | Dominant   | 39/18          | 12/4       | 76/27         | 0.4698                | 0.8390                |
|       |            | Recessive  | 8/49           | 2/14       | 27/76         | 0.0743                | 0.3812                |
|       |            | Allele     | 47/67          | 14/18      | 103/103       | 0.1321                | 0.5106                |
|       | rs7562653  | Codominant | 9/26/22        | 5/6/5      | 16/54/33      | 0.6699                | 0.2790                |
|       |            | Dominant   | 35/22          | 11/5       | 70/33         | 0.4030                | 0.9498                |
|       |            | Recessive  | 9/48           | 5/11       | 16/87         | 0.9660                | 0.1250                |
|       |            | Allele     | 44/70          | 16/16      | 86/120        | 0.5826                | 0.3801                |
|       | rs479333   | Codominant | 4/27/26        | 2/9/5      | 13/47/43      | 0.5391                | 0.7010                |
|       |            | Dominant   | 31/26          | 11/5       | 60/43         | 0.6363                | 0.4258                |
|       |            | Recessive  | 4/53           | 2/14       | 13/90         | 0.4044                | 0.6956                |
|       |            | Allele     | 35/79          | 13/19      | 73/133        | 0.3910                | 0.5698                |
|       | rs385076   | Codominant | 8/26/23        | 4/7/5      | 15/51/37      | 0.8543                | 0.5698                |
|       |            | Dominant   | 34/23          | 11/5       | 66/37         | 0.5795                | 0.7160                |
|       |            | Recessive  | 8/49           | 4/12       | 15/88         | 0.9274                | 0.4880                |

|       |            | Allele     | 42/72   | 15/17  | 81/125   | 0.6625    | 0.4177 |
|-------|------------|------------|---------|--------|----------|-----------|--------|
| NLRC5 | rs12598522 | Codominant | 17/31/9 | 6/6/4  | 20/53/30 | 0.1077    | 0.2594 |
|       |            | Dominant   | 48/9    | 12/4   | 73/30    | 0.0599    | 0.9661 |
|       |            | Recessive  | 17/40   | 6/10   | 20/83    | 0.1349    | 0.1034 |
|       |            | Allele     | 65/49   | 18/14  | 93/113   | 0.0419 *  | 0.2414 |
|       | rs34531240 | Codominant | 9/26/22 | 4/8/4  | 17/61/25 | 0.1477    | 0.6796 |
|       |            | Dominant   | 35/22   | 12/4   | 78/25    | 0.0568    | 0.8027 |
|       |            | Recessive  | 9/48    | 4/12   | 17/86    | 0.9065    | 0.6335 |
|       |            | Allele     | 44/70   | 16/16  | 95/111   | 0.1937    | 0.6820 |
|       | rs28438857 | Codominant | 9/26/22 | 4/8/4  | 17/61/25 | 0.1477    | 0.6796 |
|       |            | Dominant   | 35/22   | 12/4   | 78/25    | 0.0568    | 0.8027 |
|       |            | Recessive  | 9/48    | 4/12   | 17/86    | 0.9065    | 0.6335 |
|       |            | Allele     | 44/70   | 16/16  | 95/111   | 0.1937    | 0.6820 |
|       | rs3995818  | Codominant | 9/27/21 | 4/8/4  | 17/61/25 | 0.2270    | 0.6796 |
|       |            | Dominant   | 36/21   | 12/4   | 78/25    | 0.0925    | 0.8027 |
|       |            | Recessive  | 9/48    | 4/12   | 17/86    | 0.9065    | 0.6335 |
|       |            | Allele     | 45/69   | 16/16  | 95/111   | 0.2513    | 0.6820 |
|       | rs3995817  | Codominant | 9/26/22 | 4/8/4  | 17/61/25 | 0.1477    | 0.6796 |
|       |            | Dominant   | 35/22   | 12/4   | 78/25    | 0.0568    | 0.8027 |
|       |            | Recessive  | 9/48    | 4/12   | 17/86    | 0.9065    | 0.6335 |
|       |            | Allele     | 44/70   | 16/16  | 95/111   | 0.1937    | 0.6820 |
|       | rs1684579  | Codominant | 9/21/27 | 3/10/3 | 17/60/26 | 0.0125 *  | 0.8506 |
|       |            | Dominant   | 30/27   | 13/3   | 77/26    | 0.0044 ** | 0.8027 |
|       |            | Recessive  | 9/48    | 3/13   | 17/86    | 0.9065    | 0.8919 |
|       |            | Allele     | 39/75   | 16/16  | 94/112   | 0.0471 *  | 0.6447 |
|       | rs3751705  | Codominant | 8/24/25 | 1/8/7  | 12/41/50 | 0.8243    | 0.6751 |
|       |            | Dominant   | 32/25   | 9/7    | 53/50    | 0.5696    | 0.7210 |
|       |            | Recessive  | 8/49    | 1/15   | 12/91    | 0.6623    | 1      |
|       |            | Allele     | 40/74   | 10/22  | 65/141   | 0.5190    | 0.9726 |

<sup>1</sup> P1: The association between NLR genes polymorphisms and non-ABPA.

<sup>2</sup> P2: The association between NLR genes polymorphisms and ABPA

\*, a *p* value < 0.05; \*\*, a *p* value < 0.01.

**Supplementary Table S3.** Genotype distribution of NLRs SNPs in IPA group, CPA group and controls.

| Gene  | SNP        | Model      | IPA Group | CPA Group | Control Group | P1 Value <sup>1</sup> | P2 Value <sup>2</sup> |
|-------|------------|------------|-----------|-----------|---------------|-----------------------|-----------------------|
| NLRP3 | rs3806265  | Codominant | 13/11/6   | 4/13/10   | 14/61/28      | 0.0017 **             | 0.5503                |
|       |            | Dominant   | 24/6      | 17/10     | 75/28         | 0.4273                | 0.3164                |
|       |            | Recessive  | 13/17     | 4/23      | 14/89         | 0.0004 ***            | 0.8813                |
|       |            | Allele     | 37/23     | 21/33     | 89/117        | 0.0117 *              | 0.5678                |
|       | rs7525979  | Codominant | 1/10/19   | 2/7/18    | 0/37/66       | 0.1756                | 0.0159                |
|       |            | Dominant   | 11/19     | 9/18      | 37/66         | 0.9405                | 0.8023                |
|       |            | Recessive  | 1/29      | 2/25      | 0/103         | 0.2256                | 0.0419                |
|       |            | Allele     | 12/48     | 11/43     | 37/169        | 0.7200                | 0.6846                |
|       | rs10754558 | Codominant | 6/12/12   | 12/9/6    | 26/45/32      | 0.6378                | 0.1478                |
|       |            | Dominant   | 18/12     | 21/6      | 71/32         | 0.3602                | 0.3684                |
|       |            | Recessive  | 6/24      | 12/15     | 26/77         | 0.5544                | 0.0509                |
|       |            | Allele     | 24/36     | 33/21     | 97/109        | 0.3319                | 0.0666                |

|       |            |            |         |         |          |           |        |
|-------|------------|------------|---------|---------|----------|-----------|--------|
| NLRC4 | rs12989936 | Codominant | 2/14/14 | 2/12/13 | 14/48/41 | 0.5514    | 0.5931 |
|       |            | Dominant   | 16/14   | 14/13   | 62/41    | 0.5019    | 0.4336 |
|       |            | Recessive  | 2/28    | 2/25    | 14/89    | 0.4794    | 0.5880 |
|       |            | Allele     | 18/42   | 16/38   | 76/130   | 0.3256    | 0.3204 |
|       | rs212704   | Codominant | 4/16/10 | 4/15/8  | 27/49/27 | 0.3271    | 0.4641 |
|       |            | Dominant   | 20/10   | 19/8    | 76/27    | 0.4438    | 0.7217 |
|       |            | Recessive  | 4/26    | 4/23    | 27/76    | 0.2213    | 0.3254 |
|       |            | Allele     | 24/36   | 23/31   | 103/103  | 0.1723    | 0.3323 |
|       | rs7562653  | Codominant | 5/13/12 | 4/13/10 | 16/54/33 | 0.6585    | 0.8848 |
|       |            | Dominant   | 18/12   | 17/10   | 70/33    | 0.4174    | 0.6232 |
|       |            | Recessive  | 5/25    | 4/23    | 16/87    | 0.8810    | 0.8357 |
|       |            | Allele     | 23/37   | 21/33   | 86/120   | 0.6360    | 0.7040 |
|       | rs479333   | Codominant | 2/14/14 | 2/13/12 | 13/47/43 | 0.6482    | 0.7520 |
|       |            | Dominant   | 16/14   | 15/12   | 60/43    | 0.6319    | 0.8007 |
|       |            | Recessive  | 2/28    | 2/25    | 13/90    | 0.5794    | 0.6771 |
|       |            | Allele     | 18/42   | 17/37   | 73/133   | 0.4347    | 0.5866 |
|       | rs385076   | Codominant | 4/14/12 | 4/12/11 | 15/51/37 | 0.9194    | 0.8830 |
|       |            | Dominant   | 18/12   | 16/11   | 66/37    | 0.6837    | 0.6442 |
|       |            | Recessive  | 4/26    | 4/23    | 15/88    | 0.8989    | 0.7848 |
|       |            | Allele     | 22/38   | 20/34   | 81/125   | 0.7104    | 0.7593 |
| NLRC5 | rs12598522 | Codominant | 8/17/5  | 9/14/4  | 20/53/30 | 0.3552    | 0.1709 |
|       |            | Dominant   | 25/5    | 23/4    | 73/30    | 0.1726    | 0.2076 |
|       |            | Recessive  | 8/22    | 9/18    | 20/83    | 0.3914    | 0.1221 |
|       |            | Allele     | 33/27   | 32/22   | 93/113   | 0.1785    | 0.0646 |
|       | rs34531240 | Codominant | 4/13/13 | 5/13/9  | 17/61/25 | 0.1251    | 0.5533 |
|       |            | Dominant   | 17/13   | 18/9    | 78/25    | 0.0420 *  | 0.3403 |
|       |            | Recessive  | 4/26    | 5/22    | 17/86    | 0.8928    | 0.8038 |
|       |            | Allele     | 21/39   | 23/31   | 95/111   | 0.1265    | 0.6434 |
|       | rs28438857 | Codominant | 4/13/13 | 5/13/9  | 17/61/25 | 0.1251    | 0.5533 |
|       |            | Dominant   | 17/13   | 18/9    | 78/25    | 0.0420 *  | 0.3403 |
|       |            | Recessive  | 4/26    | 5/22    | 17/86    | 0.8928    | 0.8038 |
|       |            | Allele     | 21/39   | 23/31   | 95/111   | 0.1265    | 0.6434 |
|       | rs3995818  | Codominant | 4/13/13 | 5/14/8  | 17/61/25 | 0.1251    | 0.7809 |
|       |            | Dominant   | 17/13   | 19/8    | 78/25    | 0.0420 *  | 0.5691 |
|       |            | Recessive  | 4/26    | 5/22    | 17/86    | 0.8928    | 0.8038 |
|       |            | Allele     | 21/39   | 24/30   | 95/111   | 0.1265    | 0.8262 |
|       | rs3995817  | Codominant | 4/13/13 | 5/13/9  | 17/61/25 | 0.1251    | 0.5533 |
|       |            | Dominant   | 17/13   | 18/9    | 78/25    | 0.0420 *  | 0.3403 |
|       |            | Recessive  | 4/26    | 5/22    | 17/86    | 0.8928    | 0.8038 |
|       |            | Allele     | 21/39   | 23/31   | 95/111   | 0.1265    | 0.6434 |
|       | rs1684579  | Codominant | 5/9/16  | 4/12/11 | 17/60/26 | 0.0092 ** | 0.2753 |
|       |            | Dominant   | 14/16   | 16/11   | 77/26    | 0.0036 ** | 0.1122 |
|       |            | Recessive  | 5/25    | 4/23    | 17/86    | 0.9833    | 0.9352 |
|       |            | Allele     | 19/41   | 20/34   | 94/112   | 0.0541    | 0.2573 |
|       | rs3751705  | Codominant | 4/14/12 | 4/10/13 | 12/41/50 | 0.7107    | 0.8974 |
|       |            | Dominant   | 18/12   | 14/13   | 53/50    | 0.4091    | 0.9708 |
|       |            | Recessive  | 4/26    | 4/23    | 12/91    | 0.9446    | 0.9073 |
|       |            | Allele     | 22/38   | 18/36   | 65/141   | 0.4575    | 0.8028 |

<sup>1</sup>P1: The association between NLR genes polymorphisms and IPA

<sup>2</sup>P2: The association between NLR genes polymorphisms and CPA

\*, a *p* value < 0.05; \*\*, a *p* value <0.01; \*\*\*, a *p* value <0.001.
